# Supplementary material
Source: PubMed Central journal article supplement (PMC2746130)

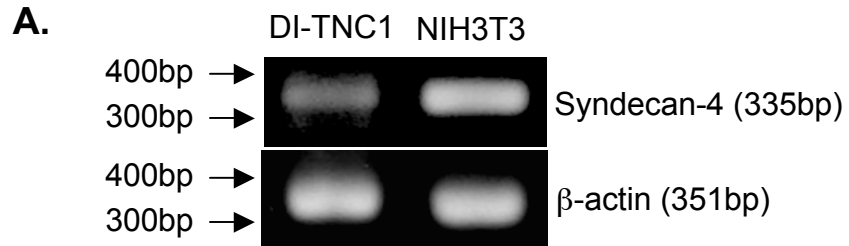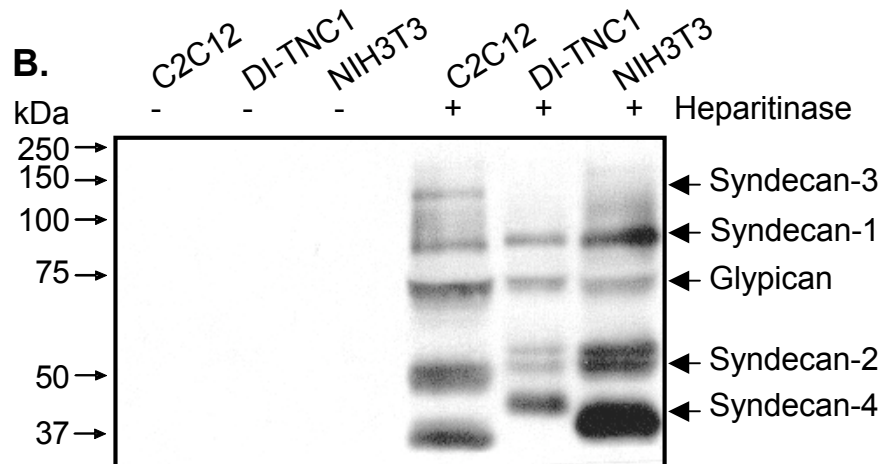

Supplement: jcs.034827_1.pdf [file jcs.034827_1.pdf]

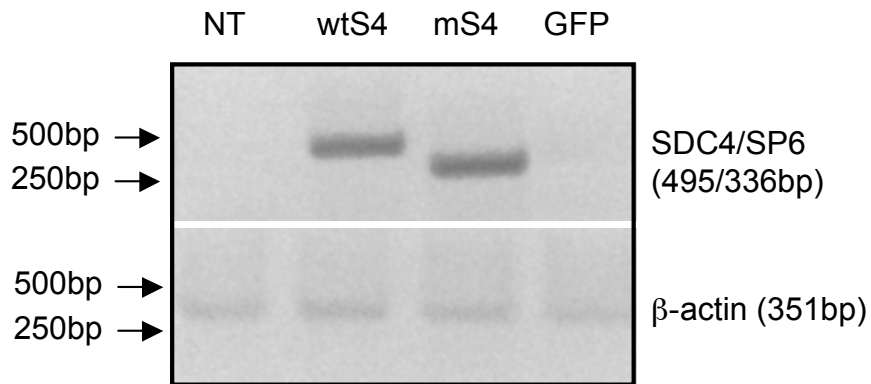

Supplement: jcs.034827_2.pdf [file jcs.034827_2.pdf]
